# Supplementary material
Source: PubMed Central journal article supplement (PMC4047177)
Supplement: NIHMS578570-supplement-Supp_FugureS1-S6.pdf [file NIHMS578570-supplement-Supp_FugureS1-S6.pdf]

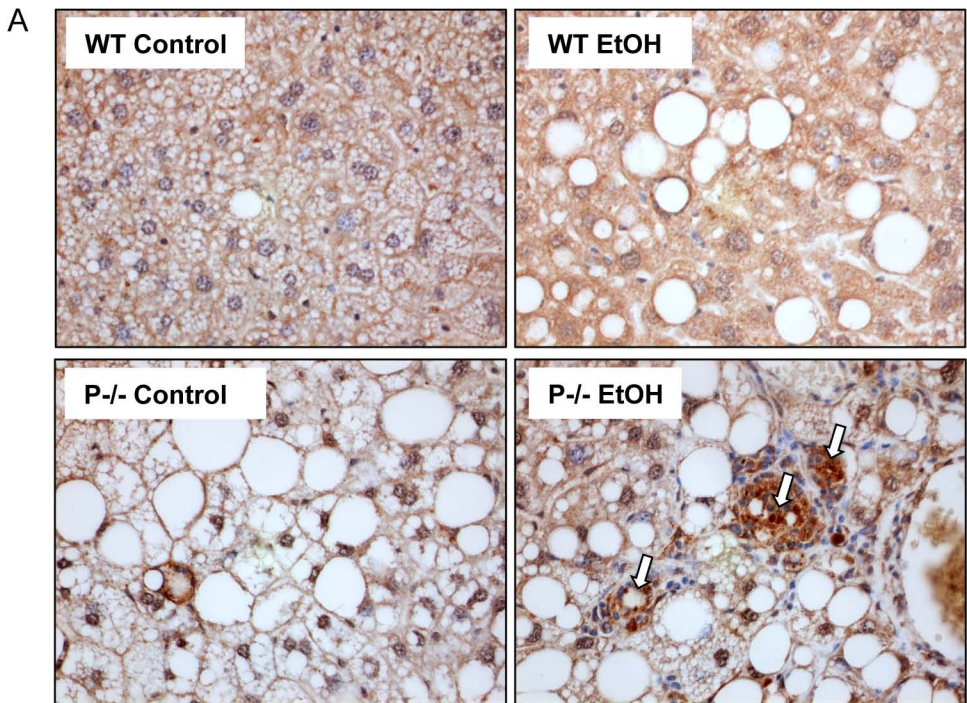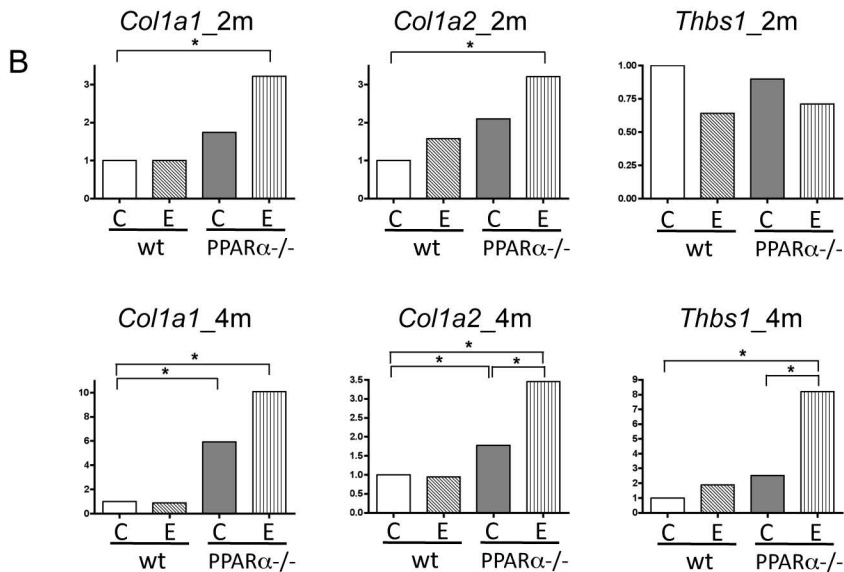

Supplementary Figure 1. Fibrogenesis changes in alcohol-fed *PPAR $\alpha$ <sup>-/-</sup>* mice. (A) Immunohistochemical staining of  $\alpha$ -smooth muscle actin ( $\alpha$ -SMA) of mice fed for six-month. (B) Microarray results of three genes in hepatic fibrogenesis after two- and four- month feeding. Y-axis represents the relative mRNA levels of the specified gene comparing to wt control. \* indicates significant difference was observed between two groups ( $P$  value < 0.05)

20130423\_HH\_Std\_MSMS\_NEG\_2 1033 (5.870)

**A1: MS/MS of 407.3 (-) Cholic acid authentic compound**

1: TOF MSMS 407.28ES-  
407.3309 2.03e4

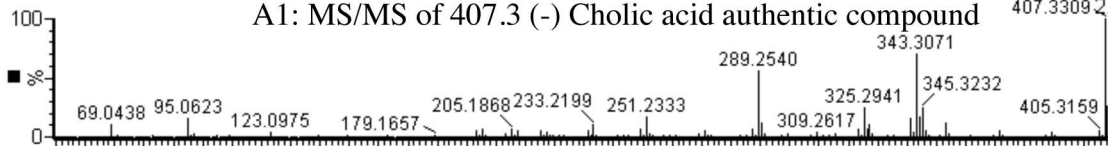

20130423\_HH\_Sample\_MSMS\_NEG\_8 1030 (5.850)

**A2: MS/MS of 407.3 (-) Liver extract sample**

1: TOF MSMS 407.28ES-  
407.3315 3.81e3

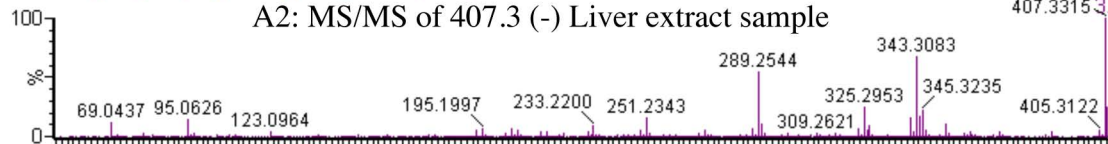

20130423\_HH\_Std\_MSMS\_NEG\_1 937 (5.323)

**B1: MS/MS of 514.3 (-) Taurocholic acid authentic compound**

1: TOF MSMS 514.26ES-  
514.3448 209

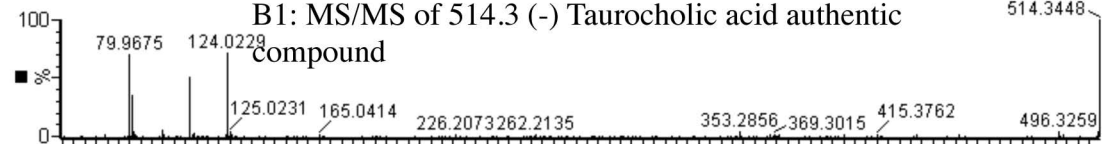

20130423\_HH\_Sample\_MSMS\_NEG\_5 937 (5.324)

**B2: MS/MS of 514.3 (-) Liver extract sample**

1: TOF MSMS 514.26ES-  
514.3383 7.59e4

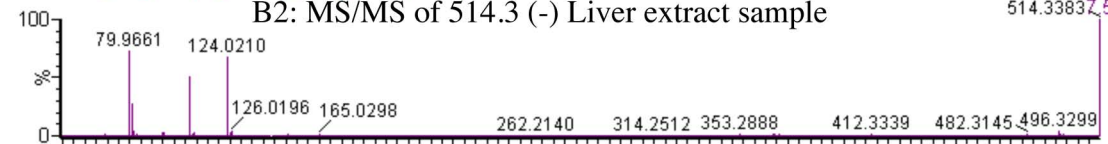

Supplementary Figure 2. Verification of metabolite IDs. A1 and B1 are MS/MS spectra of authentic compounds of cholic acid and taurocholic acid respectively. A2 and B2 are MS/MS spectra of the ions (m/z values 407.3 and 514.3 respectively) obtained in liver extract samples.

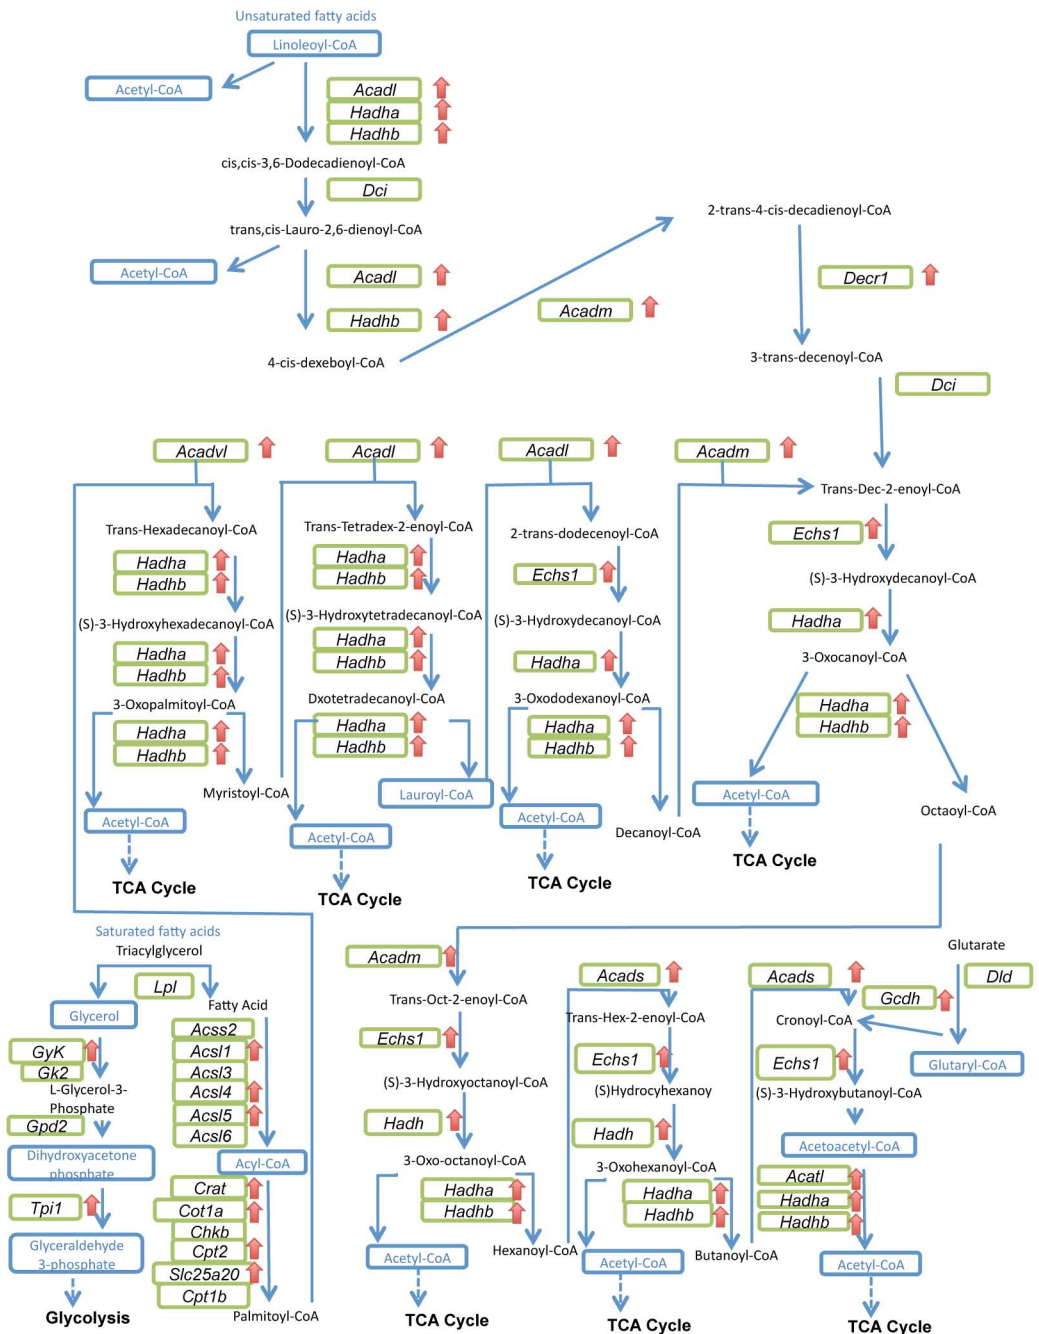

Supplementary Figure 3. A diagram of the fatty acid  $\beta$ -oxidation pathway, the genes with a red up arrow are those showing either an induction with fold change of more than 1.5 or statistical significant difference (P value < 0.05) or those meeting both criteria.

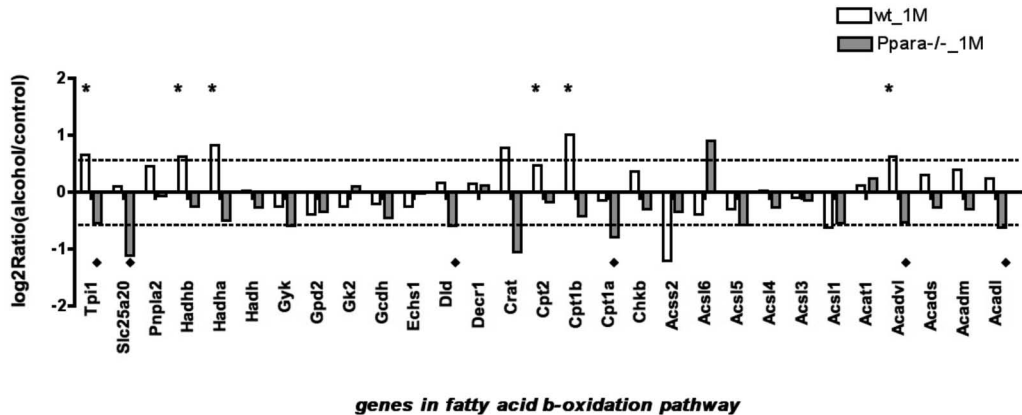

Supplementary Figure 4. Alteration of expression of genes involved in fatty acid  $\beta$ -oxidation at one month of alcohol feeding. Y-axis represents Log2Ratio(alcohol-fed/control). The marks of “\*” and “◆” indicate statistically significant difference observed in wild type and Ppara $\alpha$ -nullmice respectively.

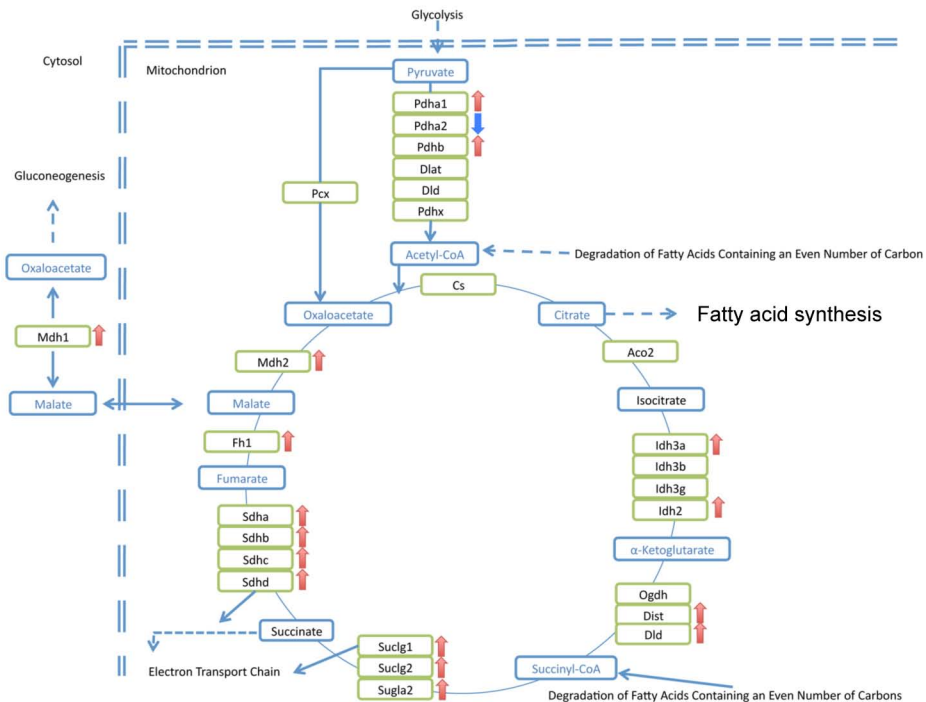

Supplementary Figure 5. A diagram of the TCA cycle, the genes with a red up arrow are those showing either an induction with fold change of more than 1.5 or statistical significant difference (P value < 0.05) or those meeting both criteria.

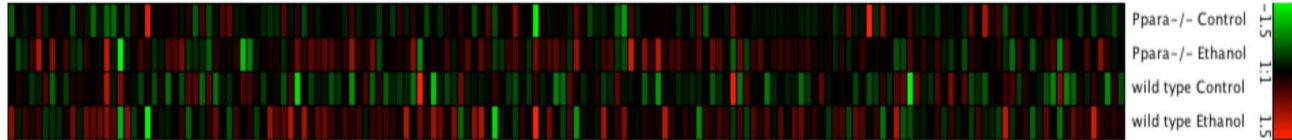

Supplementary Figure 6. Heatmap of transcriptomics data of genes involved in purine metabolism. The raw data was pre-processed with Partek Genomics Suite as described in Material and methods. Processed intensity data was visualized by Genesis (<http://genome.tugraz.at/>).
